# Supplementary material for: Triptycene derivatives as high-Tghost materials for various electrophosphorescent devices
Source: Royal Society of Chemistry journal article supplement (doi:10.1039/b918188a), 2009-12-01
Supplement: b918188a.pdf [file b918188a.pdf]

## Supplementary data

### Triptycene Derivatives as High- $T_g$ Host Materials for Various Electrophosphorescent Devices†

Ho-Hsiu Chou, Hung-Hsin Shih, and Chien-Hong Cheng\*

National Research Initiative Department of Chemistry, National Tsing Hua University, Hsinchu 30013, Taiwan,

E-mail: [chcheng@mx.nthu.edu.tw](mailto:chcheng@mx.nthu.edu.tw), Fax: 886-3-572469, Tel: 886-3-5721454

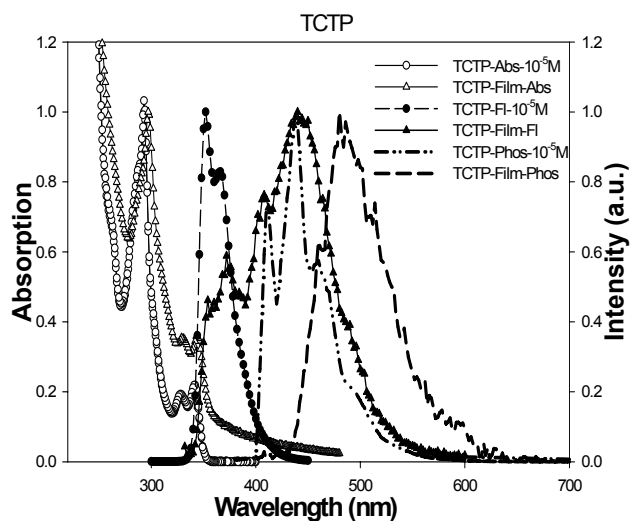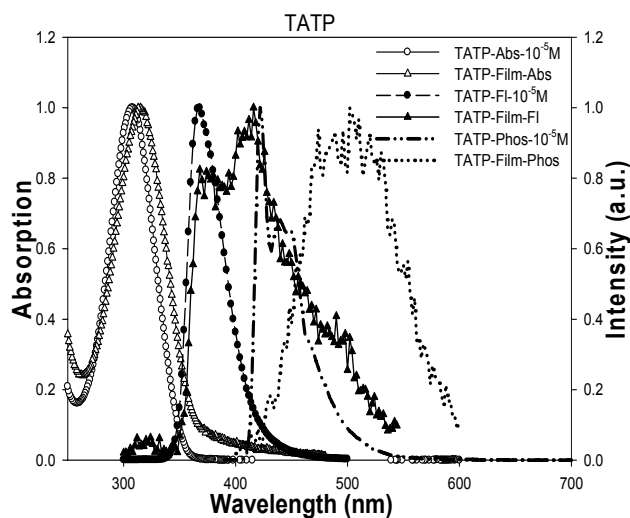

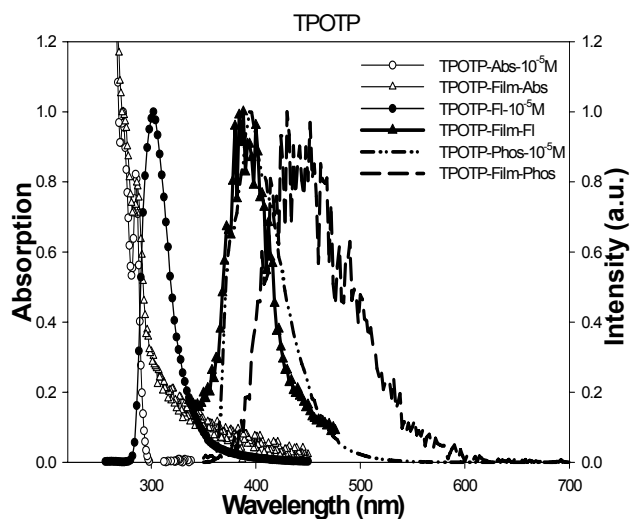

**Fig. S1.** The UV-vis absorption and fluorescence (room temperature) and phosphorescence thin film spectra (77 K) of TCTP, TATP and TPOTP with thickness of 300 nm (red lines); the corresponding solution spectra were also recorded for comparison (blue lines).

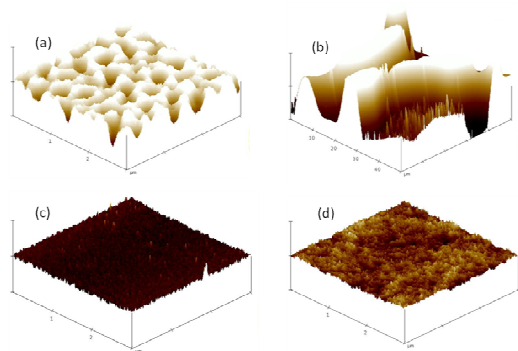

**Fig. S2.** Surface morphology of *m*CP and TPOTP doped with 6% FIrpic by AFM. (a) *m*CP without annealing, (b) *m*CP after annealing at 120 °C under nitrogen for 15 h, (c) TPOTP without annealing, and (d) TPOTP after annealing at 120 °C under nitrogen for 15 h (the rms roughness value of (a), (b), (c), and (d) are 1.755, 29.574, 0.340, 0.383, respectively).
